# Supplementary figures and images for: Importance of protein flexibility in ranking ERK2 Type I1/2 inhibitor affinities: a computational study
Source: PubMed Central journal article supplement — RSC Adv. 2019 Apr 23;9(22):12441–54. doi: 10.1039/c9ra01657k (PMC9063686; doi:10.1039/c9ra01657k), 2019-04-23

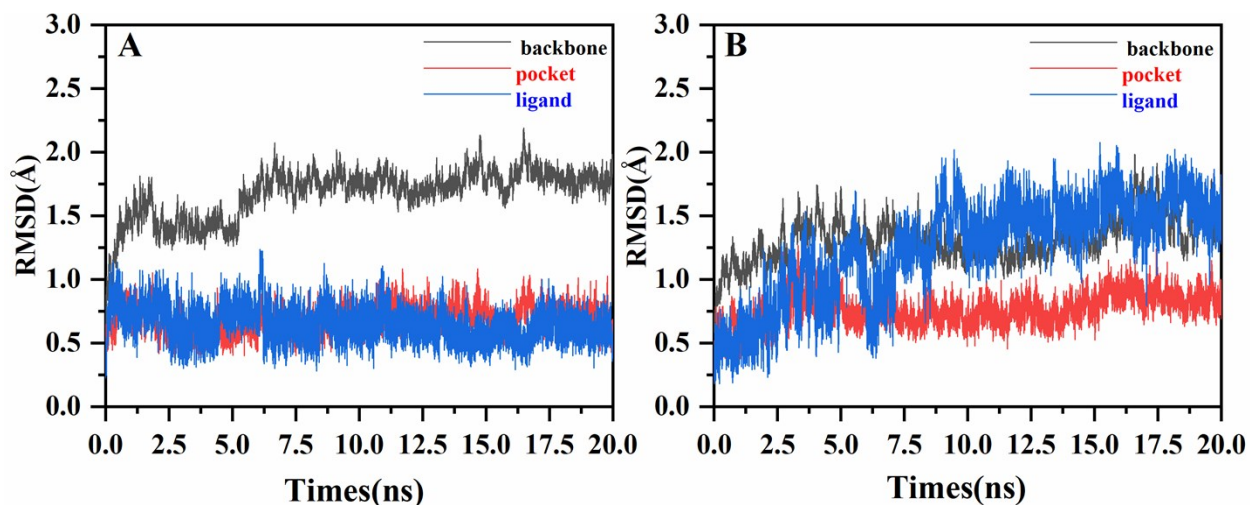

Figure S1

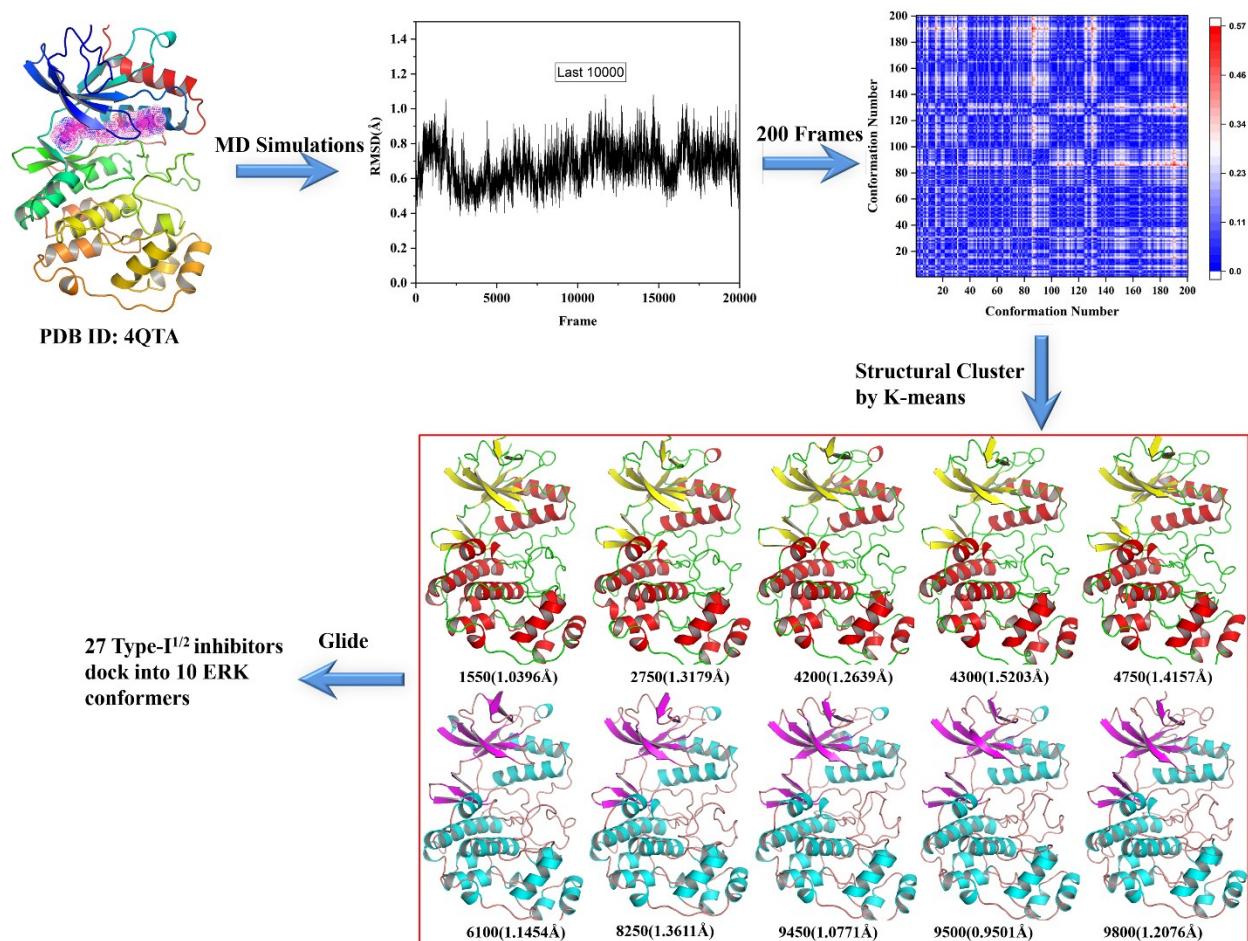

Figure S2

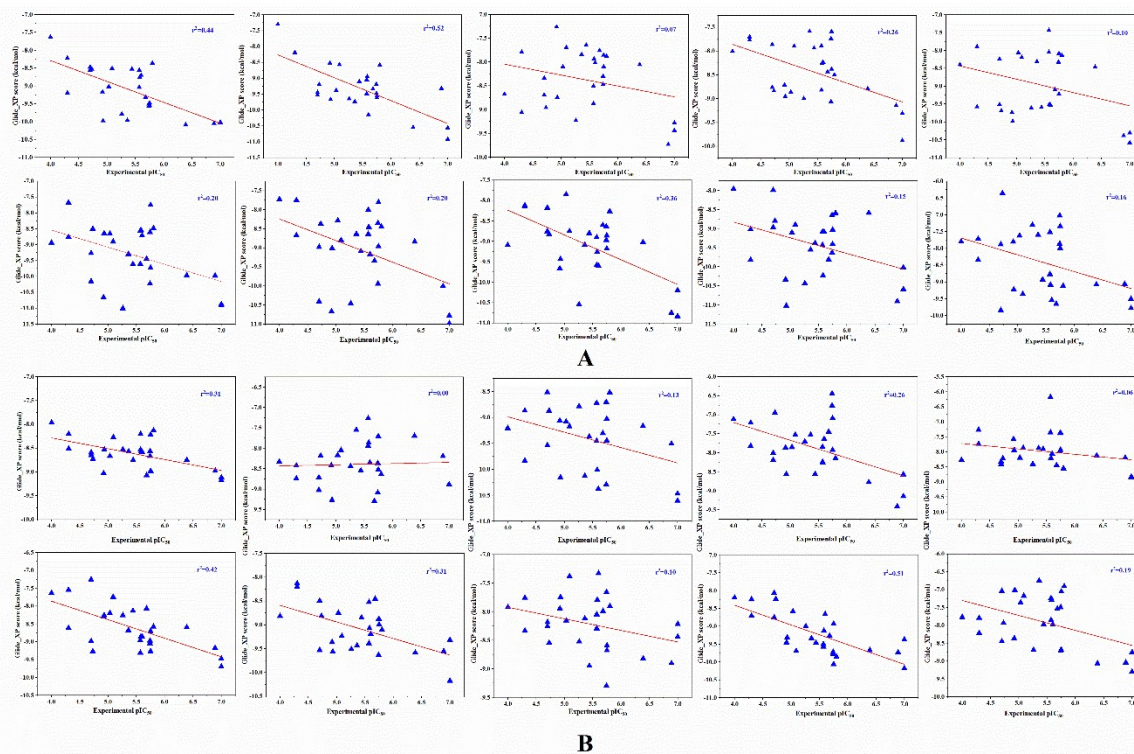

Figure S3

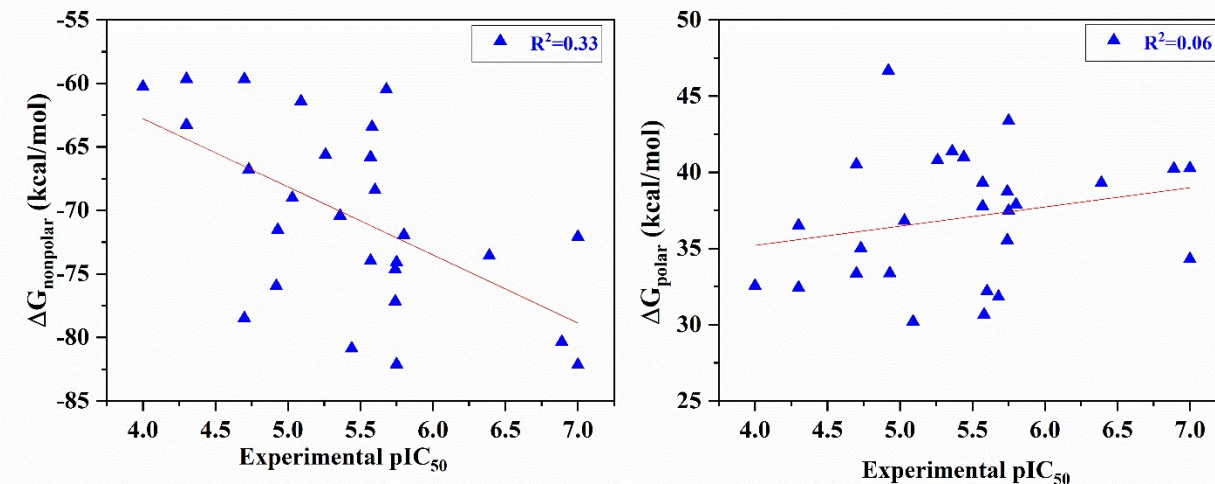

Figure S4

Supplement: RA-009-C9RA01657K-s001.pdf [file RA-009-C9RA01657K-s001.pdf]
